# Supplementary material for: Periodic and aperiodic neural activity displays age-dependent changes across early-to-middle childhood
Source: PubMed Central journal article supplement — Dev Cogn Neurosci. 2022 Jan 22;54:101076. doi: 10.1016/j.dcn.2022.101076 (PMC8800045; doi:10.1016/j.dcn.2022.101076), 2022-01-22
Supplement: mmc1.pdf [file mmc1.pdf]

# Periodic and Aperiodic Neural Activity Displays Age-Dependent Changes Across Early-to-Middle Childhood

Aron T. Hill PhD

Gillian M. Clark PhD

Felicity J. Bigelow GDipPsych

Jarrad A. G. Lum PhD

Peter G. Enticott PhD

## SUPPLEMENTARY MATERIALS AND METHODS

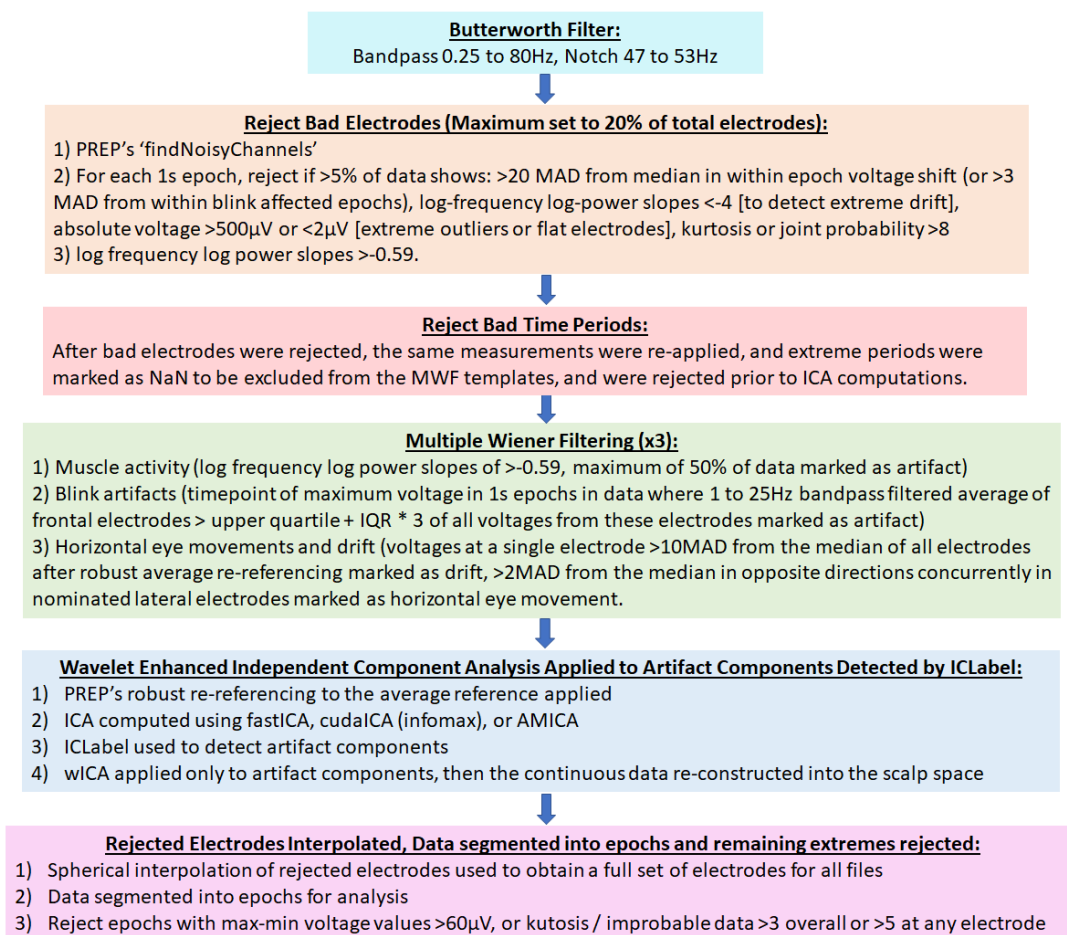

**Figure S1.** Overview of the typical steps involved in the Reduction of Electrophysiological Artefacts (RELAX) pipeline which was utilised to pre-process the resting-state EEG data (from Bailey *et al.*, 2021).

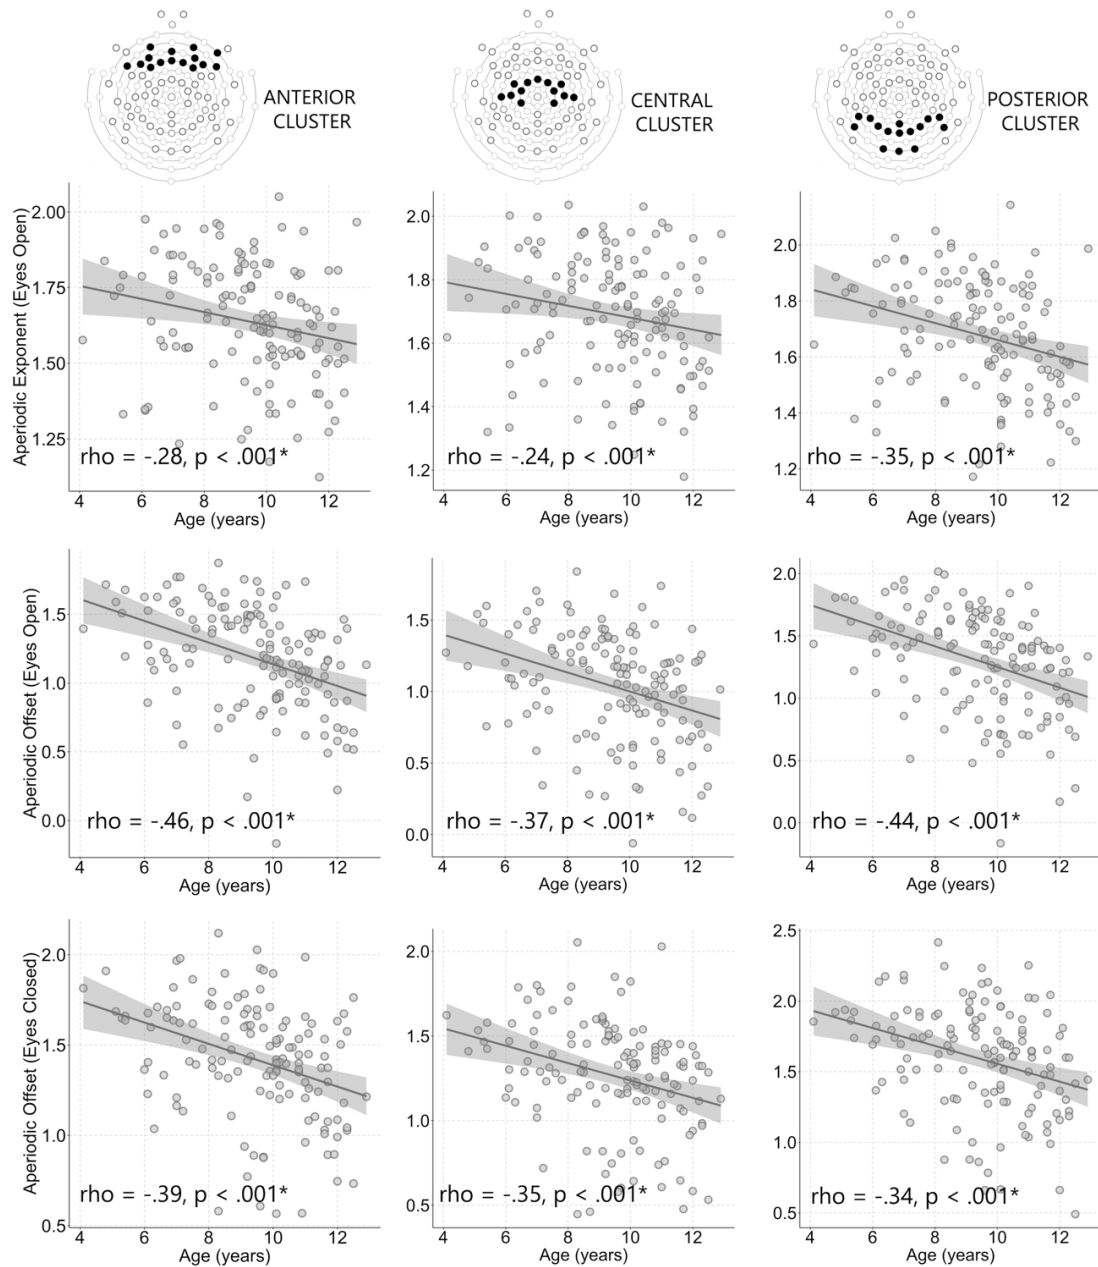

**Figure S2:** Correlations between age and either aperiodic exponent (eyes open), or offset (eyes open, eyes closed) for electrode clusters taken from anterior, central, and posterior regions. Regardless of the specific cluster used, there was a negative association between age and either aperiodic exponent, or offset.

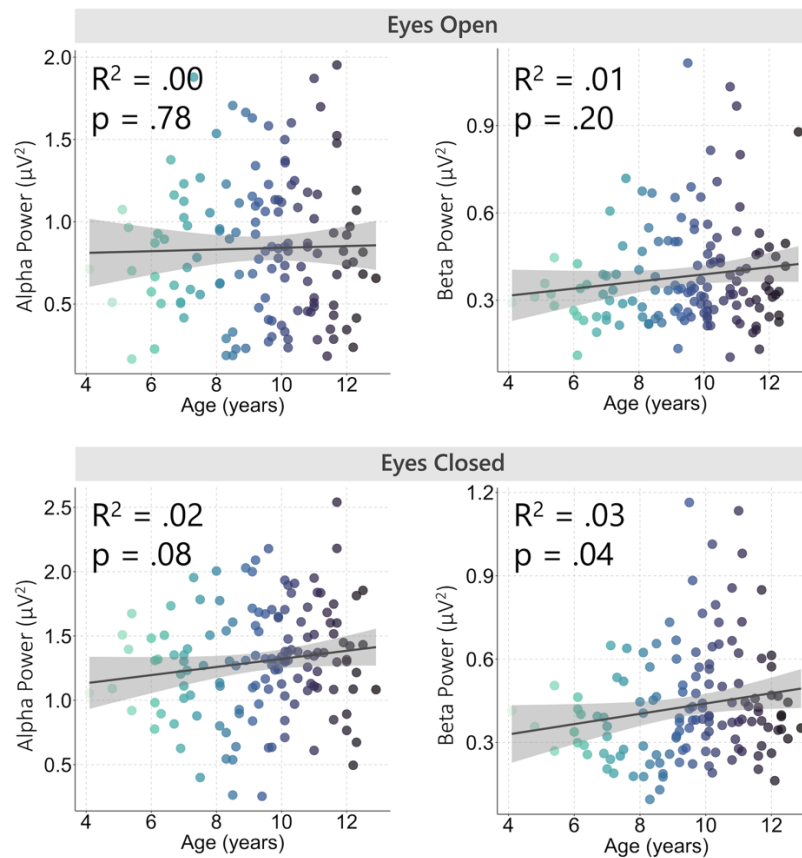

**Figure S3:** Scatter plots of spectral power in relation to age for the alpha and beta frequency bands. Significance values from the regression analyses are shown. Age was unable to significantly predict power within either the alpha or beta frequency ranges (after Bonferroni correction) for either the eyes open, or eyes closed data.

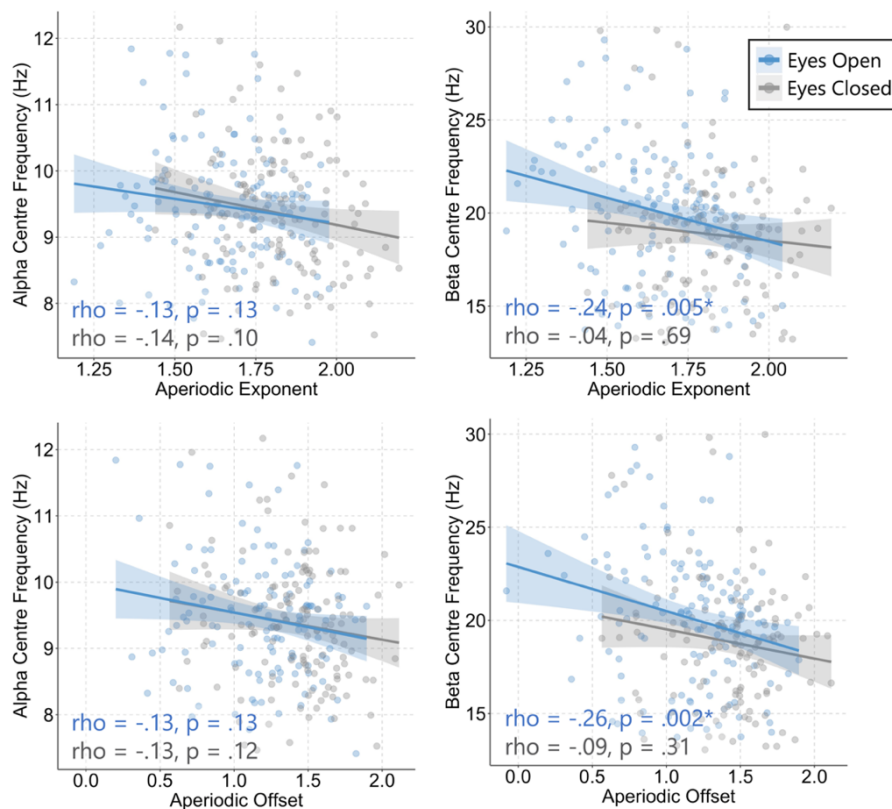

**Figure S4:** Correlations between alpha and beta centre frequency and aperiodic exponent (upper panel), as well as aperiodic offset (lower panel). Significant associations were found between beta centre frequency and aperiodic exponent and offset for the eyes open conditions only. Asterisk denotes significant result after Bonferroni correction.

Supplemental Table 1: Demographic information

| <b>Variable</b>                                    | <b>Descriptive Statistics</b> |
|----------------------------------------------------|-------------------------------|
| Participant Age (Mean $\pm$ SD)                    | 9.41 $\pm$ 1.95               |
| Participant Gender (M/F)                           | 72/67                         |
| Participant WASI FSIQ (Mean $\pm$ SD)              | 110.32 $\pm$ 12.59            |
| Participant Average No. of Siblings                | 1.36                          |
| Primary Caregiver Gender (M/F)                     | 7/122                         |
| Primary Caregiver Marital Status                   |                               |
| Unmarried                                          | 12                            |
| Married                                            | 97                            |
| Divorced/Separated/Widowed                         | 17                            |
| Primary Caregiver Country of Birth                 |                               |
| Australia                                          | 86                            |
| Asia-Pacific (excl. Aus)                           | 28                            |
| Europe                                             | 8                             |
| North America                                      | 2                             |
| Other                                              | 1                             |
| Primary Caregiver Highest Education Level Achieved |                               |
| Secondary School                                   | 23                            |
| Certificate/Diploma/Trade                          | 30                            |
| Undergraduate University                           | 43                            |
| Postgraduate University                            | 16                            |
| Primary Caregiver Employment Status                |                               |
| Full-time employed                                 | 24                            |
| Part-time employed                                 | 57                            |
| Casually employed                                  | 21                            |
| Unemployed                                         | 25                            |
| Annual Household Income (AUD)                      |                               |
| <\$20K                                             | 2                             |
| \$20-40K                                           | 14                            |
| \$40-60K                                           | 7                             |
| \$60-80K                                           | 11                            |
| \$80-100K                                          | 9                             |
| \$100-120K                                         | 15                            |
| \$120-140K                                         | 16                            |
| >\$140K                                            | 22                            |

Note: Complete demographic information was unavailable for some participants/caregivers and was thus not included in the table.

## EEG Data

### *Preprocessing: Epoch Rejection*

The average percentage of epochs rejected for the eyes open and eyes closed data, respectively was 3.3% (mean trial no. = 32.89, SD = 4.05) and 6.7% (mean trial no. = 32.29, SD = 5.95). The number of trials did not significantly differ between the two groups ( $t(138) = -1.17$ ,  $p = 0.245$ ).

### *Association between participant age and number of EEG trials*

Spearman correlations did not show any association between age and number of trials, for either the eyes open ( $\rho = 0.037$ ,  $p = 0.665$ ), or eyes closed ( $\rho = 0.017$ ,  $p = 0.842$ ) conditions.

### *Goodness-of-fit of the FOOOF model and age*

There was no association between  $R^2$  and age for either the eyes open ( $\rho = -0.134$ ,  $p = 0.115$ ), or eyes closed ( $\rho = -0.050$ ,  $p = 0.559$ ) conditions; nor was there an association between Error and age (eyes open:  $\rho = -0.010$ ,  $p = 0.907$ ; eyes closed:  $\rho = 0.017$ ,  $p = 0.844$ ). There was, however, a weak association between  $R^2$  and epoch number for the eyes open condition ( $\rho = 0.232$ ,  $p = 0.006$ ), as well as for the eyes closed condition ( $\rho = 0.177$ ,  $p = 0.037$ ), however the latter was non-significant after correcting for the two conditions. There was also a weak but significant association between Error and epoch number for the eyes open condition ( $\rho = -0.255$ ,  $p = 0.002$ ), and the eyes closed condition ( $\rho = -0.221$ ,  $p = 0.009$ ).

## Reference

Bailey, N. W., Biabani, M., Hill, A. T., Rogasch, N. C., McQueen, B., & Fitzgerald, P. B. (2021). Introducing RELAX (the Reduction of Electrophysiological Artifacts): A fully automatic pre-processing pipeline for EEG data. *In Preparation*.
